# Supplementary material for: Voltammetric Determination of Active Pharmaceutical Ingredients Using Screen-Printed Electrodes
Source: MDPI journal article supplement (doi:10.3390/chemosensors10030095), 2022-03-01
Supplement: s1 [file s1]

Supplementary material

# Voltammetric Determination of Active Pharmaceutical Ingredients Using Screen-Printed Electrodes

Paula Clares <sup>1</sup>, Clara Pérez-Ràfols <sup>1,2,\*</sup>, Núria Serrano <sup>1,2,\*</sup> and José Manuel Díaz-Cruz <sup>1,2</sup>

<sup>1</sup> Department of Chemical Engineering and Analytical Chemistry, University of Barcelona, Martí i Franquès 1-11, 08028 Barcelona, Spain; paulaclares99@gmail.com (P.C.); josemanuel.diaz@ub.edu (J.M.D.-C.)

<sup>2</sup> Institut de Recerca de l'Aigua (IdRA), University of Barcelona, 08028 Barcelona, Spain

\* Correspondence: claraperezrafols@ub.edu (C.P.-R.); nuria.serrano@ub.edu (N.S.)

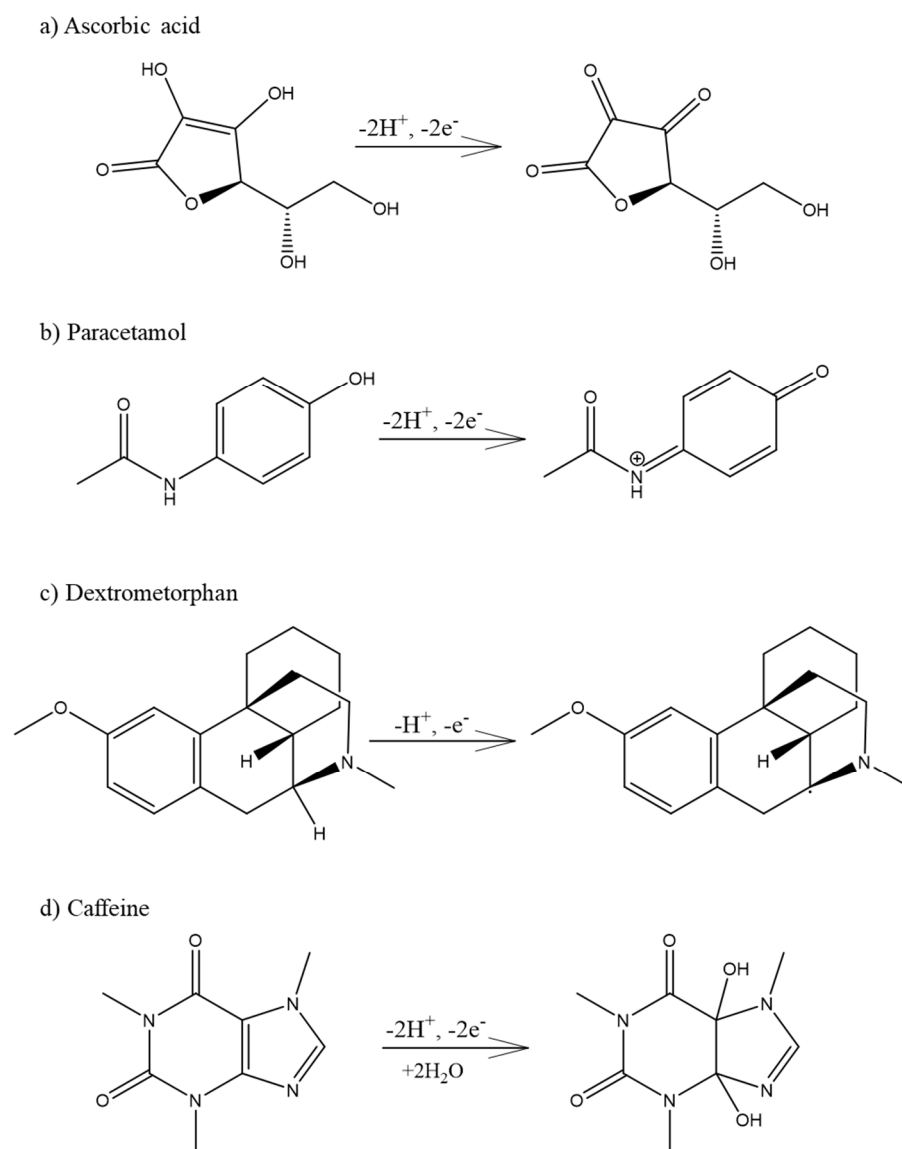

**Figure S1.** Oxidation reactions for (a) ascorbic acid [27], (b) paracetamol [28], (c) dextrometorphan [28], and (d) caffeine [29].

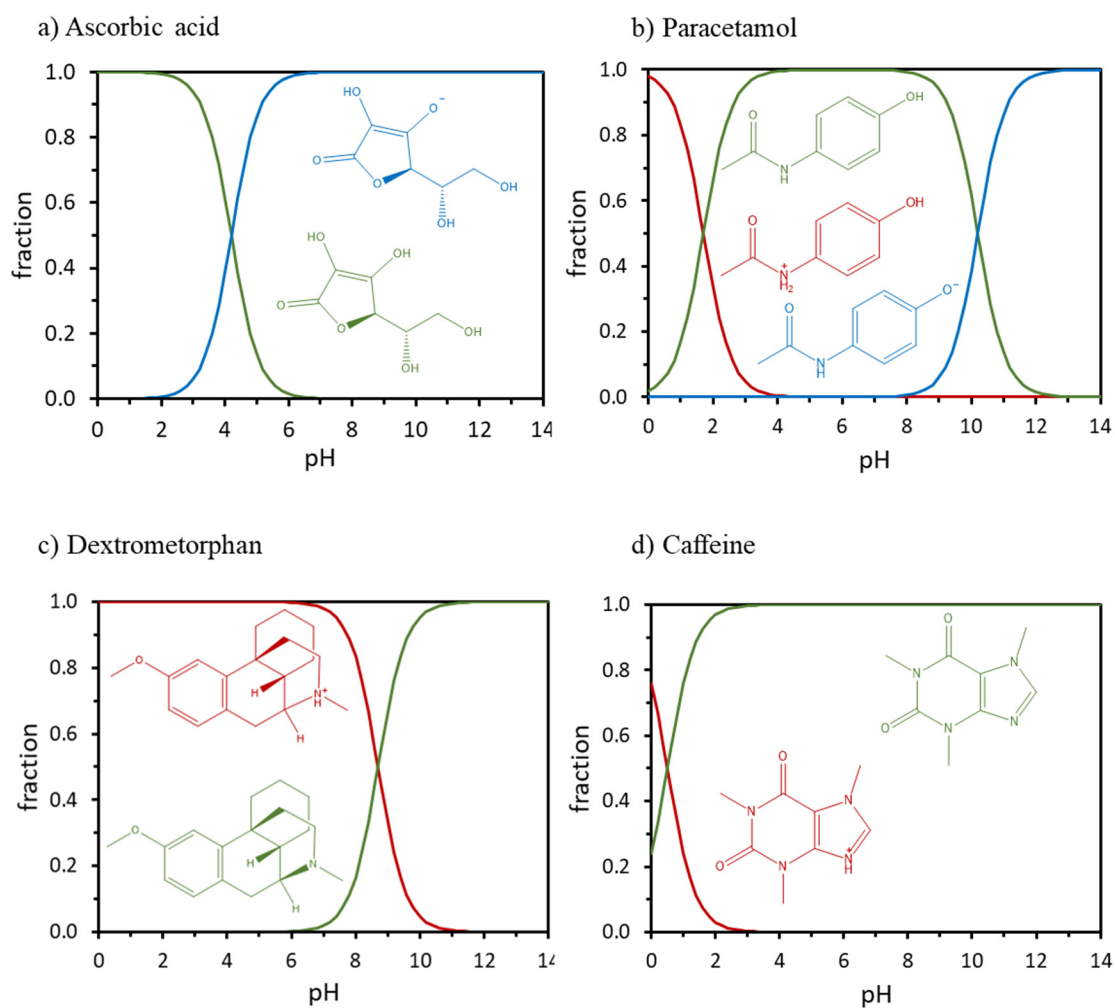

**Figure S2.** Species distribution diagram as a function of pH for (a) ascorbic acid, (b) paracetamol, (c) dextrometorphan and (d) caffeine. Cationic, neutral and anionic forms are depicted in red, green and blue, respectively.

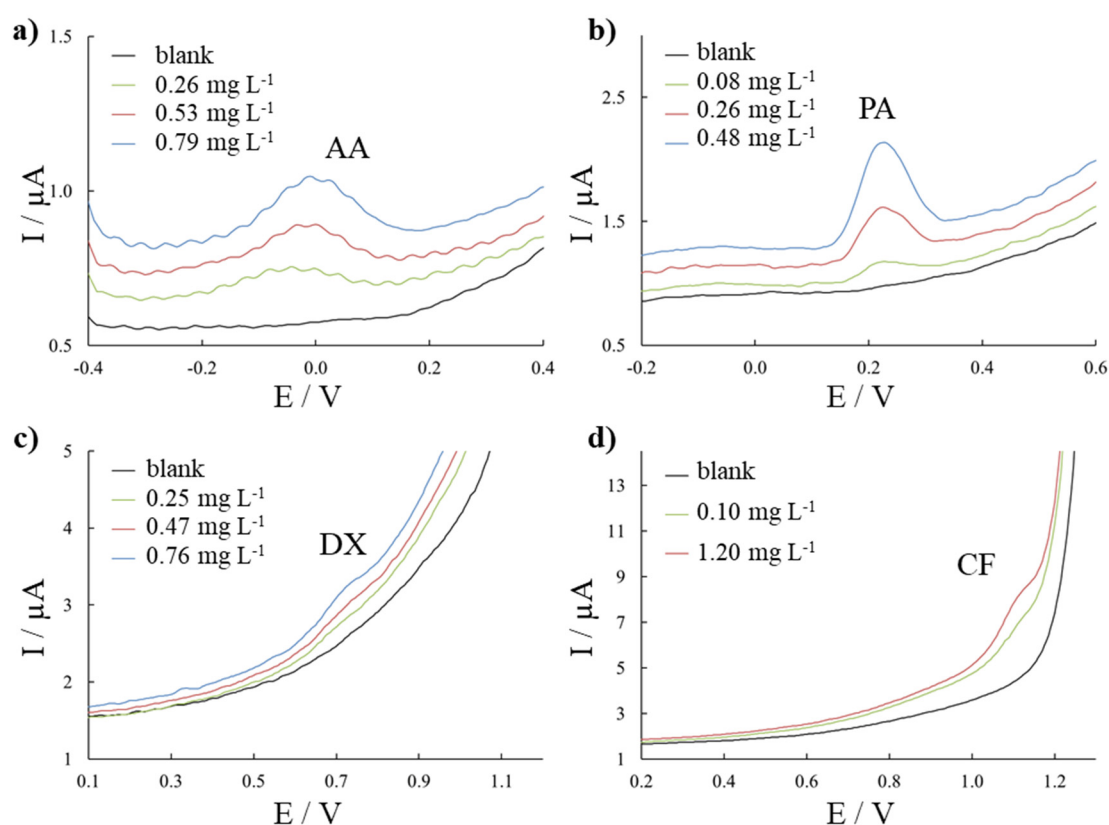

**Figure S3.** DP voltammograms for low concentrations of (a) ascorbic acid, (b) paracetamol, (c) dexametorphan and (d) caffeine. Measurements were carried out in 0.1 mol  $\text{L}^{-1}$  acetic/acetate buffer pH 5.00 using a SPCE.

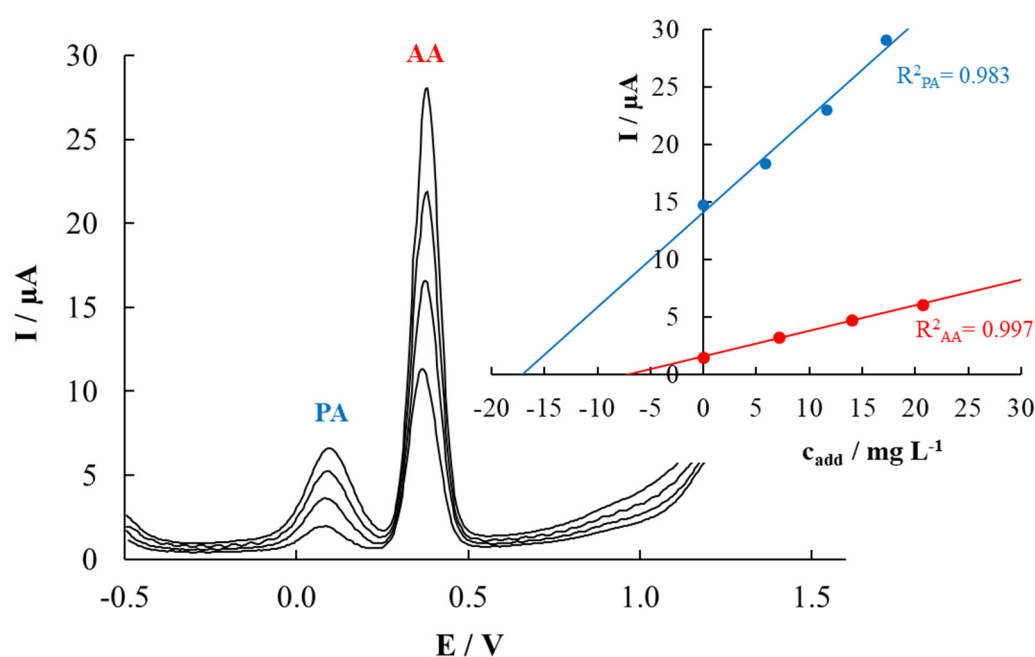

**Figure S4.** DP voltammograms for the simultaneous determination of ascorbic acid and paracetamol in Frenadol® Complex. Measurements were carried out in 0.1 mol  $\text{L}^{-1}$  acetic/acetate buffer pH 5.00 using a SPCE. Inset: standard addition calibration plot.

**Table S1.** Summary of E vs. pH plots obtained from relevant data published in [30].

| Substance | Plot of E (V) vs. pH |           |           | R <sup>2</sup> | Comments                                                                                                                       |
|-----------|----------------------|-----------|-----------|----------------|--------------------------------------------------------------------------------------------------------------------------------|
|           | pH range             | Slope (V) | Intercept |                |                                                                                                                                |
| AA        | 2.0–5.0              | −0.062    | 0.47      | 0.940          | Compatible with a 2H <sup>+</sup> , 2e <sup>−</sup> process (slope ideally −0.059 V) starting from the protonated form of AA   |
|           | 5.0–8.0              | −0.026    | 0.30      | 0.947          | Compatible with a 1H <sup>+</sup> , 2e <sup>−</sup> process (slope ideally −0.029 V) starting from the deprotonated form of AA |
| PA        | 3.0–10.0             | −0.050    | 0.67      | 0.997          | Compatible with a 2H <sup>+</sup> , 2e <sup>−</sup> process (slope ideally −0.059 V)                                           |
| CF        | 4.0–10.0             | −0.011    | 1.37      | 0.957          | Too low slope for a 2H <sup>+</sup> , 2e <sup>−</sup> process (ideally −0.059 V)                                               |

## References

27. Osial, M.; Warczak, M.; Kulesza, P.J.; Krysiński, P.; Gniadek, M. Hybrid Polyindole-gold Nanobrush for Electrochemical Oxidation of Ascorbic Acid. *Journal of Electroanalytical Chemistry* **2020**, *877*, 114664, doi:10.1016/j.jelechem.2020.114664.
28. Amiri, M.; Rezapour, F.; Bezaatpour, A. Hydrophilic Carbon Nanoparticulates at the Surface of Carbon Paste Electrode Improve Determination of Paracetamol, Phenylephrine and Dextromethorphan. *Journal of Electroanalytical Chemistry* **2014**, *735*, 10–18, doi:10.1016/j.jelechem.2014.10.006.
29. Petrucci, R.; Zollo, G.; Curulli, A.; Marrosu, G. A New Insight into the Oxidative Mechanism of Caffeine and Related Methylxanthines in Aprotic Medium: May Caffeine Be Really Considered as an Antioxidant? *Biochimica et Biophysica Acta - General Subjects* **2018**, *1862*, 1781–1789, doi:10.1016/j.bbagen.2018.05.011.
30. Marín, J.; Serrano, N.; Ariño, C.; Díaz-Cruz, J.M. A Chemometric Survey about the Ability of Voltammetry to Discriminate Pharmaceutical Products from the Evolution of Signals as a Function of PH. *Chemosensors* **2020**, *8*, 46, doi:10.3390/CHEMOSENSORS8030046.
